# Supplementary material for: Evidence of a Natural Hybrid Oomycete Isolated from Ornamental Nursery Stock
Source: MDPI journal article supplement (doi:10.3390/jof9060627), 2023-05-29
Supplement: s1 [file s1]

# SUPPLEMENTARY MATERIALS

Table S1: Polymorphisms detected in P3 (P. x cryptogea related Hybrid) during cloning assays with COXI, TUBULIN 5\_6 AND ITS.

A.1) COXI cloning types and percentage of each cloning type, comparison of variable nucleotide positions in the COXI cloning types using P.cryptogea MH136878.1 as a reference in the comparison map. B.1)  $\beta$ -tubulin cloning types and percentage of each cloning type (using BT 5 and 6 primers), comparison of variable nucleotide positions in the  $\beta$ -tubulin cloning types using P. cryptogea MH760166.1 as a reference in the comparison map. C.1) ITS cloning types and percentage of each cloning type, comparison of variable nucleotide positions in the ITS cloning types using P. cryptogea MH178331.1 as a reference in the comparison map.

| A.1) COX I MAP TO REFERENCE         | P55 | P498 | P660 | P689-P695 |     | P705-P708 |     | P725 |      |      |      |      |      |      |      |      |  |
|-------------------------------------|-----|------|------|-----------|-----|-----------|-----|------|------|------|------|------|------|------|------|------|--|
| <i>Phytophthora cryptogea</i>       |     |      |      |           |     |           |     |      |      |      |      |      |      |      |      |      |  |
| <i>P. cryptogea</i> MH136878.1      | G   | A    | T    | TCGGTCA   |     | TTAT      |     | C    |      |      |      |      |      |      |      |      |  |
| Type 1 (50%)                        | A   | A    | T    | TCGGACA   |     | ATCG      |     | A    |      |      |      |      |      |      |      |      |  |
| Type 2 (10%)                        | A   | A    | C    | AATCACT   |     | AGTG      |     | T    |      |      |      |      |      |      |      |      |  |
| Type 3 (5%)                         | A   | A    | T    | CACTAGT   |     | GCCG      |     | A    |      |      |      |      |      |      |      |      |  |
| Type 4 (35%)                        | A   | A    | C    | TCGGTCA   |     | ATCG/AGTT |     | A/T  |      |      |      |      |      |      |      |      |  |
| Hybrid                              | A   | M    | T    | -----     |     | -----     |     | -    |      |      |      |      |      |      |      |      |  |
| <i>P. erythroseptica</i> MH136882.1 | G   | T    | T    | TCGGTCA   |     | TTAT      |     | C    |      |      |      |      |      |      |      |      |  |
| <i>P. parsiana</i> HM749282.1       | G   | T    | T    | TCGGTCA   |     | TTAT      |     | C    |      |      |      |      |      |      |      |      |  |
| <i>P. kelmanii</i> KU220616.1       | G   | A    | A    | -----     |     | -----     |     | -    |      |      |      |      |      |      |      |      |  |
| B.1) TUBULIN 5_6 MAP TO REFERENCE   | P26 | P41  | P59  | P65       | P71 | P80       | P92 | P95  | P107 | P122 | P125 | P134 | P155 | P179 | P185 | P200 |  |
| <i>Phytophthora cryptogea</i>       |     |      |      |           |     |           |     |      |      |      |      |      |      |      |      |      |  |
| <i>P. cryptogea</i> MH760166.1      | C   | G    | G    | C         | T   | G         | T   | T    | T    | G    | T    | C    | T    | G    | T    | G    |  |
| Type 1* (57%)                       | C   | G    | G    | C         | C   | G         | T   | T    | T    | G    | T    | C    | T    | G    | T    | G    |  |
| Type 2 (14.29%)                     | C   | G    | G    | C         | T   | G         | T   | T    | T    | G    | T    | C    | T    | G    | T    | G    |  |
| Type 3 (14.29%)                     | C   | G    | G    | C         | C   | G         | T   | T    | T    | G    | T    | C    | T    | G    | T    | G    |  |
| Type 4* (14.29%)                    | T   | C    | A    | T         | G   | C         | G   | C    | C    | C    | C    | G    | C    | C    | C    | C    |  |
| Hybrid (14.29%)                     | T   | A    | T    | T         | G   | G         | T   | T    | K    | T    | T    | Y    | T    | G    | Y    | S    |  |
| <i>P.erythroseptica</i> KX251896.1  | C   | G    | G    | C         | C   | G         | T   | T    | T    | G    | T    | C    | T    | G    | T    | G    |  |

|                                     |      |      |      |      |      |      |      |      |      |      |      |      |      |      |      |      |
|-------------------------------------|------|------|------|------|------|------|------|------|------|------|------|------|------|------|------|------|
| <i>Phy. chamaehyphon</i> KJ595448.1 | T    | C    | A    | T    | G    | C    | G    | C    | C    | C    | C    | G    | C    | C    | C    | C    |
|                                     | P206 | P209 | P218 | P227 | P230 | P239 | P245 | P254 | P258 | P269 | P275 | P278 | P281 | P290 | P305 | P320 |
| <i>P. cryptogea</i> MH760166.1      | T    | C    | C    | C    | G    | T    | G    | G    | T    | T    | G    | G    | G    | C    | T    | T    |
| Type 1                              | T    | C    | C    | A    | G    | T    | C    | G    | T    | T    | G    | G    | G    | T    | T    | T    |
| Type 2                              | T    | C    | C    | C    | G    | T    | G    | G    | T    | T    | G    | G    | G    | C    | T    | T    |
| Type 3                              | T    | C    | C    | A    | G    | T    | C    | G    | A    | T    | G    | G    | G    | C    | T    | T    |
| Type 4                              | C    | G    | G    | G    | C    | C    | G    | C    | T    | C    | C    | C    | C    | C    | C    | C    |
| Hybrid                              | T    | Y    | C    | A    | R    | -    | -    | R    | W    | W    | R    | G    | G    | -    | T    | T    |
| <i>P. erythroseptica</i> KX251896.1 | T    | C    | C    | A    | G    | T    | C    | G    | T    | T    | G    | G    | G    | T    | T    | T    |
| <i>Phy. chamaehyphon</i> KJ595448.1 | C    | G    | G    | G    | C    | C    | G    | C    | T    | C    | C    | C    | C    | C    | C    | C    |
|                                     | P323 | P329 | P335 | P338 | P344 | P366 | P368 | P374 | P377 | P407 | P422 | P431 | P440 | P446 | P447 | P449 |
| <i>P. cryptogea</i> MH760166.1      | T    | C    | G    | C    | T    | T    | G    | G    | C    | G    | C    | T    | T    | T    | T    | A    |
| Type 1                              | T    | C    | G    | C    | T    | C    | G    | G    | C    | G    | C    | T    | T    | T    | T    | A    |
| Type 2                              | T    | G    | G    | C    | T    | T    | G    | G    | C    | G    | C    | T    | T    | T    | T    | A    |
| Type 3                              | T    | C    | G    | C    | T    | C    | G    | G    | C    | G    | C    | T    | T    | T    | T    | A    |
| Type 4                              | C    | G    | C    | G    | C    | C    | C    | C    | G    | A    | T    | G    | C    | C    | C    | G    |
| Hybrid                              | Y    | M    | G    | G    | T    | S    | S    | R    | C    | -    | C    | W    | T    | T    | T    | A    |
| <i>P. erythroseptica</i> KX251896.1 | T    | C    | G    | C    | T    | C    | G    | G    | C    | G    | T    | G    | C    | C    | T    | A    |
| <i>Phy. chamaehyphon</i> KJ595448.1 | C    | G    | C    | G    | C    | C    | C    | C    | G    | A    | T    | G    | C    | C    | C    | G    |
|                                     | P452 | P458 | P461 | P464 | P470 | P485 | P497 | P515 | P554 | P590 | P608 |      |      |      |      |      |
| <i>P. cryptogea</i> MH760166.1      | T    | G    | G    | G    | C    | G    | T    | G    | T    | C    | C    |      |      |      |      |      |
| Type 1                              | T    | G    | G    | G    | C    | G    | C    | G    | T    | T    | T    |      |      |      |      |      |
| Type 2                              | T    | G    | G    | G    | T    | G    | T    | G    | T    | C    | T    |      |      |      |      |      |
| Type 3                              | T    | G    | G    | G    | C    | G    | C    | G    | T    | T    | T    |      |      |      |      |      |

|                                     |     |     |     |      |      |      |      |      |      |      |      |      |     |
|-------------------------------------|-----|-----|-----|------|------|------|------|------|------|------|------|------|-----|
| Type 4                              | G   | A   | C   | C    | T    | C    | C    | C    | -    | -    | -    |      |     |
| Hybrid                              | T   | R   | Y   | G    | C    | A    | T    | G    | T    | Y    | -    |      |     |
| <i>P. erythroseptica</i> KX251896.1 | T   | G   | G   | G    | C    | G    | C    | G    | T    | T    | T    |      |     |
| <i>Phy. chamaehyphon</i> KJ595448.1 | G   | A   | C   | C    | T    | C    | C    | C    | G    | C    | C    |      |     |
| <b>C.1) ITS MAP TO REFERENCE</b>    | P52 | P78 | P88 | P104 | P107 | P212 | P530 | P632 | P681 | P695 | P759 | P764 | 778 |
| <i>Phytophthora cryptogea</i>       |     |     |     |      |      |      |      |      |      |      |      |      |     |
| <i>P. cryptogea</i> MH178331.1      | C   | T   | T   | G    | T    | A    | A    | G    | T    | A    | T    | T    | C   |
| Type 1 (4.55%)                      | C   | T   | T   | G    | T    | G    | A    | A    | T    | A    | T    | T    | C   |
| Type 2 (13.64%)                     | C   | T   | T   | G    | T    | A    | A    | A    | T    | A    | T    | T    | G   |
| Type 3 (34.09%)                     | C   | T   | T   | G    | T    | A    | A    | G    | T    | A    | T    | T    | C   |
| Type 4 (6.82%)                      | C   | T   | T   | A    | T    | A    | G    | G    | T    | A    | T    | T    | C   |
| Type 5 (4.55%)                      | T   | T   | T   | G    | T    | A    | A    | G    | T    | A    | T    | T    | G   |
| Type 6 (13.64%)                     | C   | A   | C   | G    | T    | A    | A    | A    | T    | A/G  | C    | C    | C   |
| Type 7 (9.09%)                      | C   | A   | C   | G    | T    | A    | A    | G    | T    | A    | T    | T    | C   |
| Type 8 (13.64%)                     | C   | A   | C   | G    | C    | A    | A    | A    | T/C  | A    | C    | C    | C   |
| Hybrid                              | -   | -   | -   | -    | -    | A    | A    | R    | T    | A    | Y    | Y    | C   |
| <i>P. erythroseptica</i> KJ755119.1 | C   | A   | T   | G    | T    | A    | A    | G    | T    | A    | C    | T    | C   |
| <i>P. sansomeana</i> MF149917.1     | C   | A   | T   | G    | T    | A    | A    | G    | T    | A    | T    | C    | C   |
| <i>P. kelmanii</i> MN540003.1       | C   | A   | T   | G    | C    | A    | A    | A    | T    | A    | C    | C    | C   |

\* Type 4 (Tubulin 5\_6), almost identical to Type 1 (Tubulin 5\_6) but with polymorphism patterns shown to be closely related to *Phytophthora chamaehyphon*, the pattern is constant along the whole map to reference analysis
